# Supplementary material for: Imbalanced gut microbiota predicts and drives the progression of nonalcoholic fatty liver disease and nonalcoholic steatohepatitis in a fast-food diet mouse model
Source: PubMed Central journal article supplement — bioRxiv. 2023 Jan 9:2023.01.09.523249. Preprint. [Version 1] doi: 10.1101/2023.01.09.523249 (PMC9882021; doi:10.1101/2023.01.09.523249), 2023-01-09

**Figure S1**

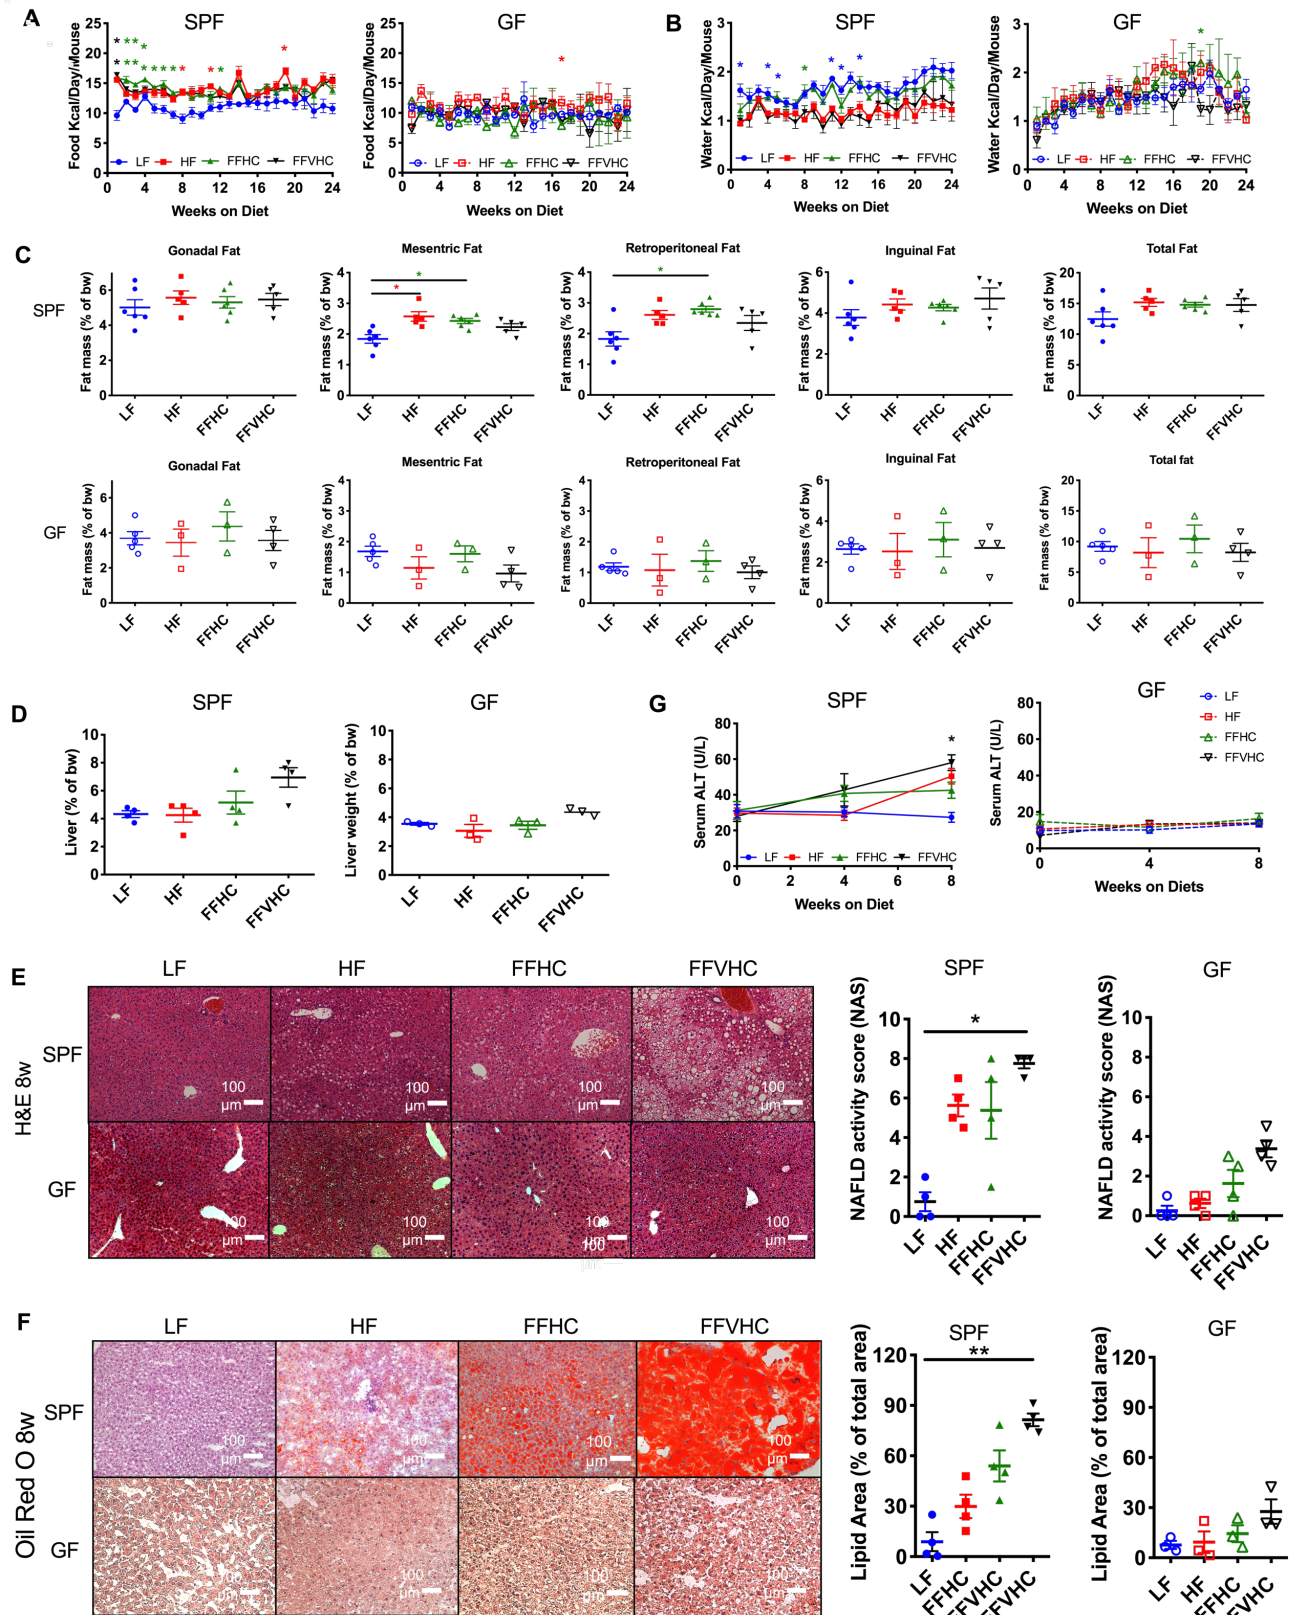

**Figure S2**

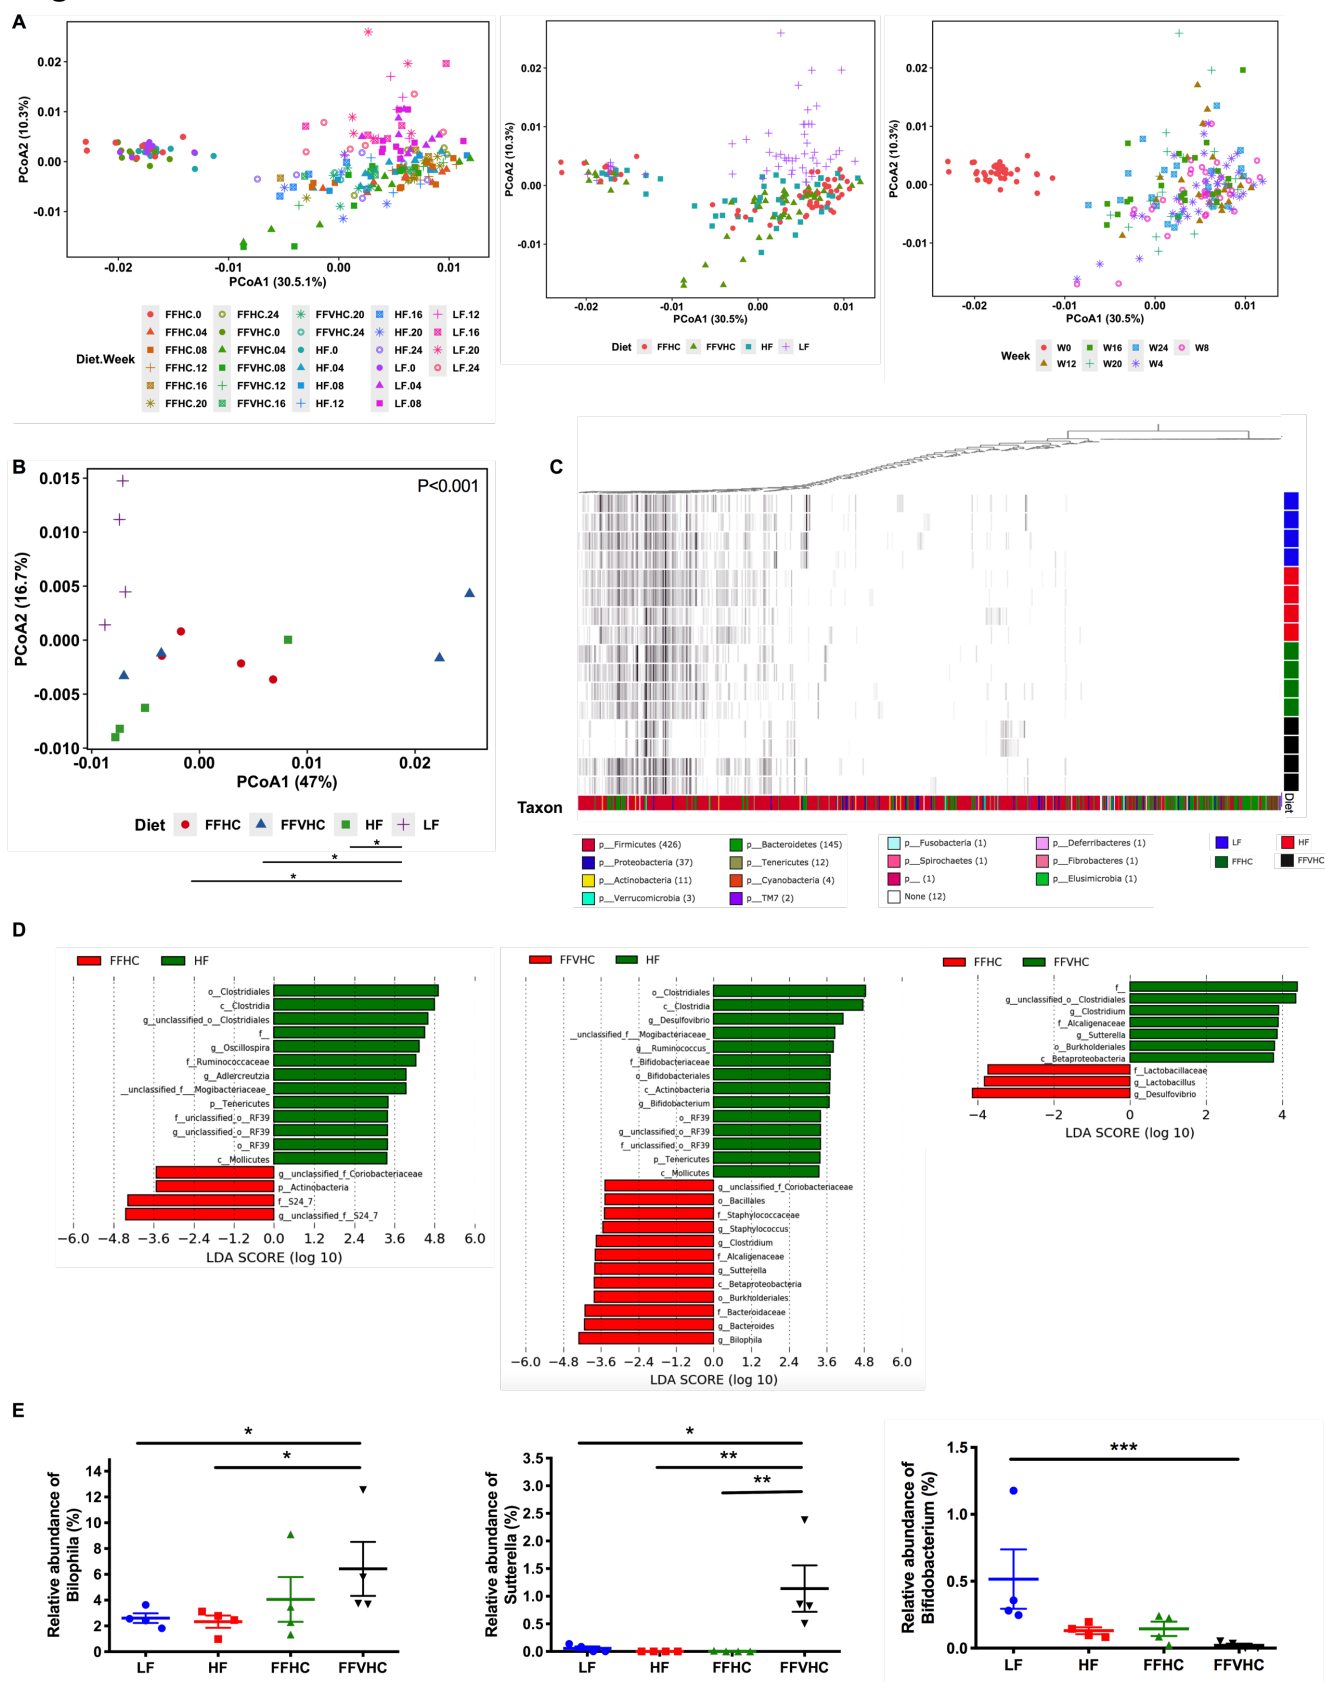

Figure S3

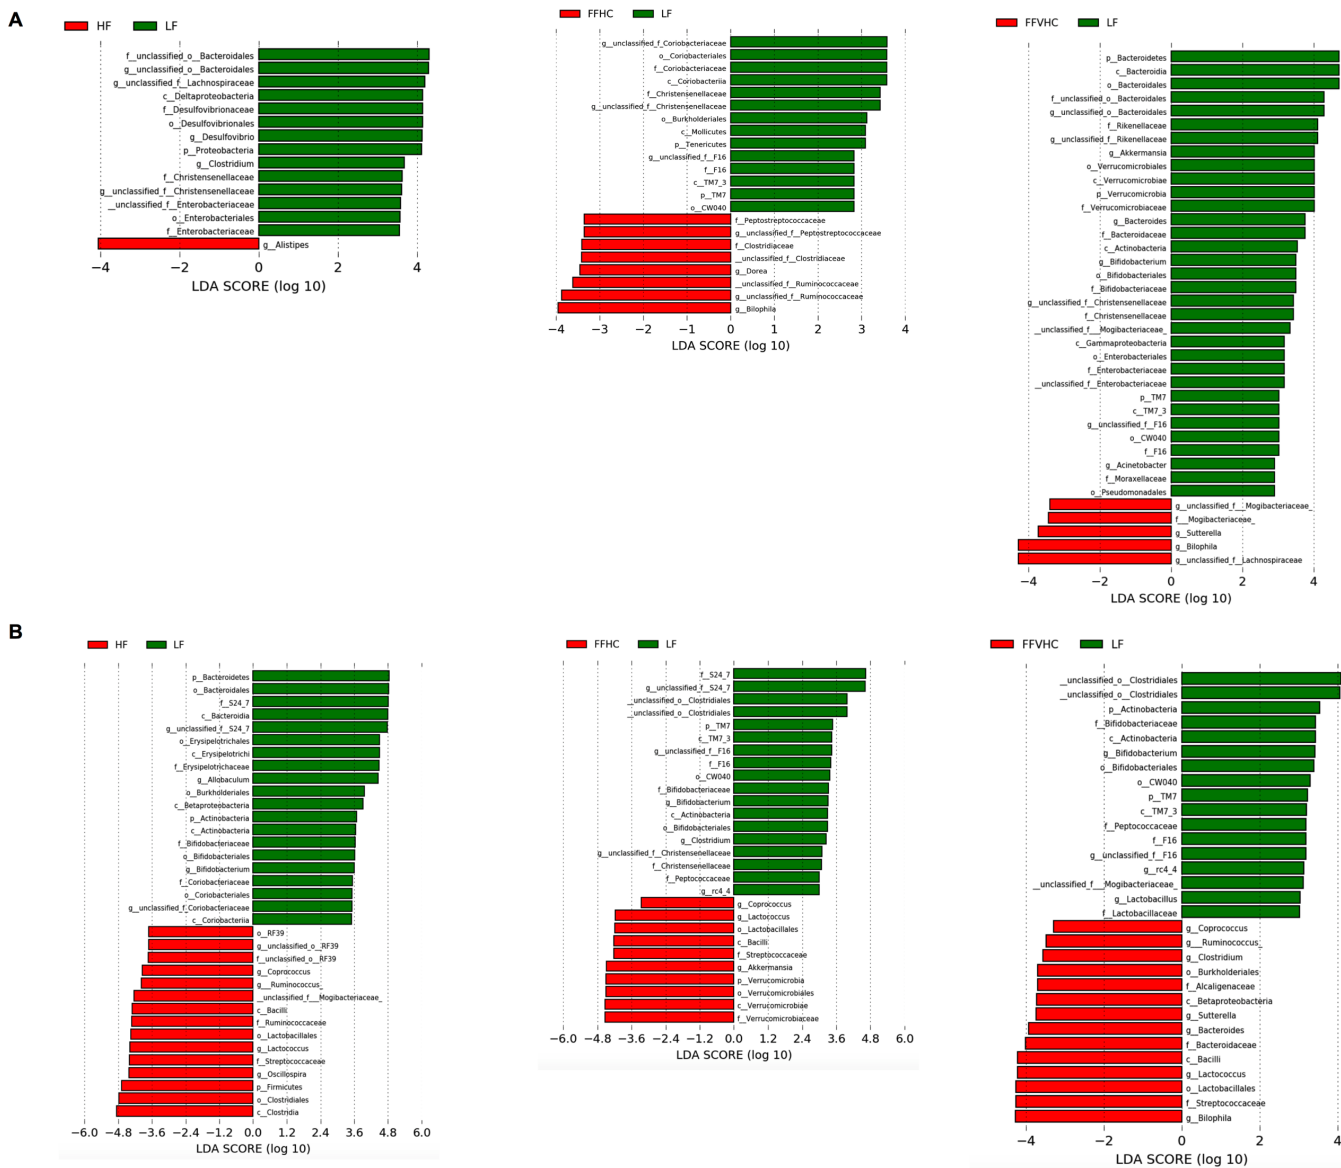

## Figure S4

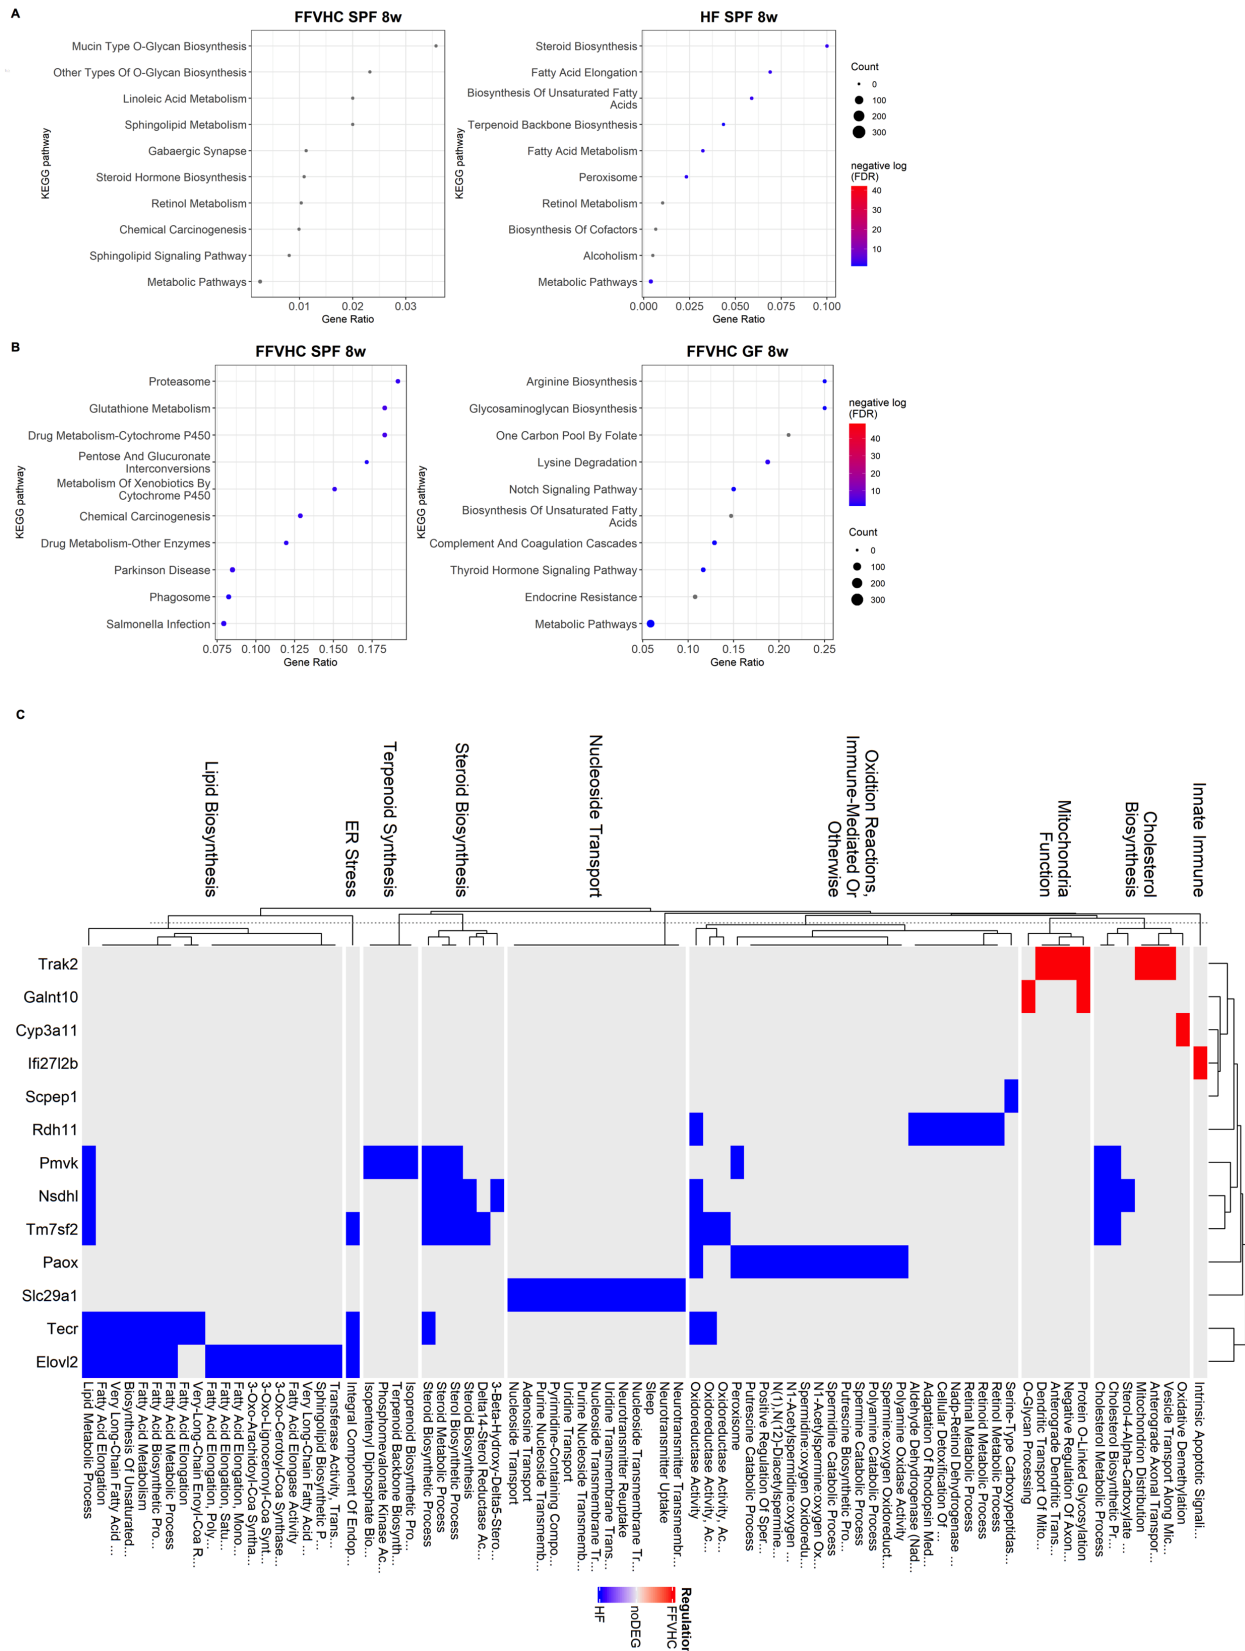

**Figure S5**

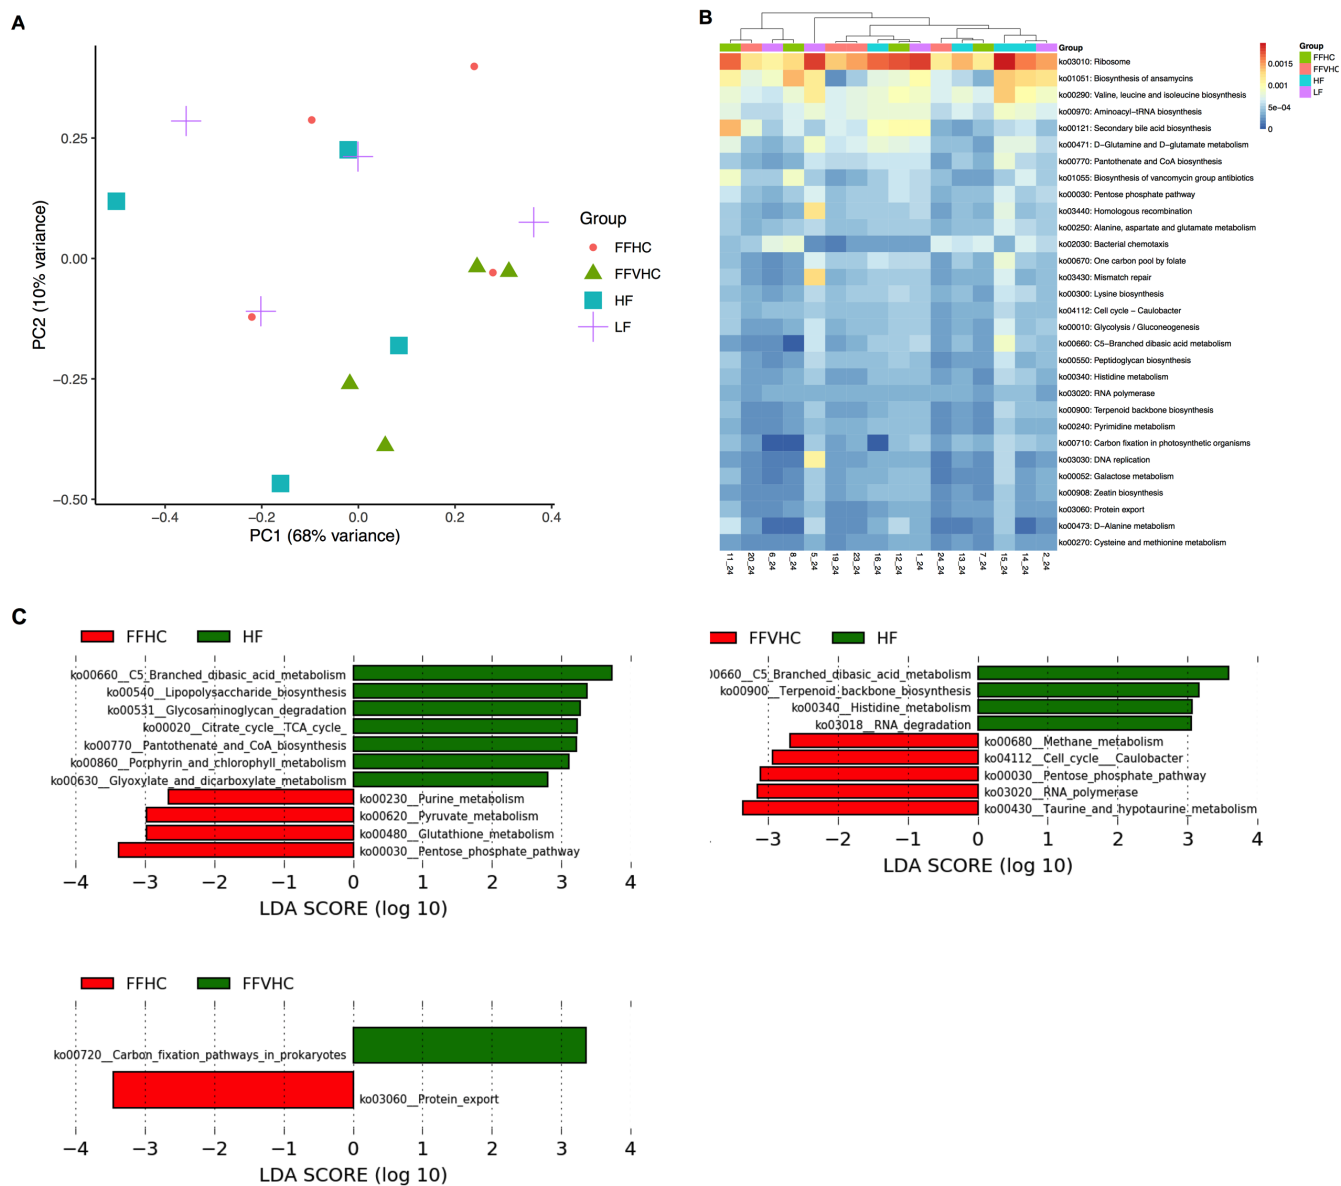

## Figure S6

### A Carbohydrate metabolism

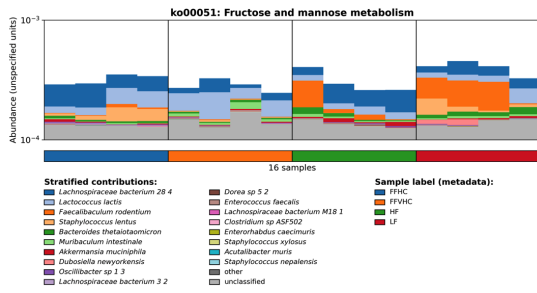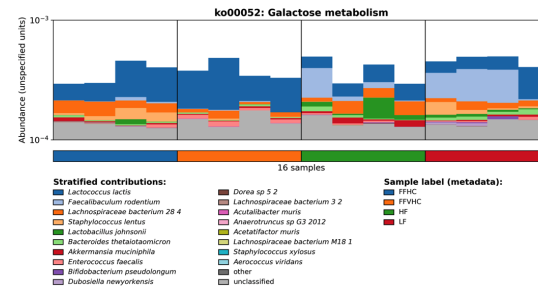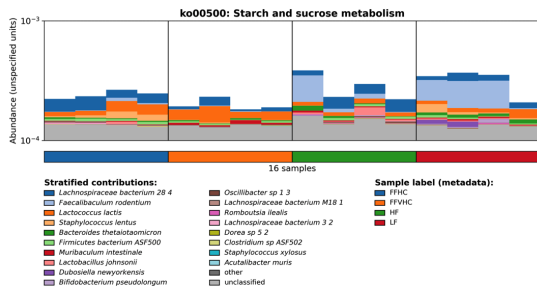

### B Amino acid metabolism

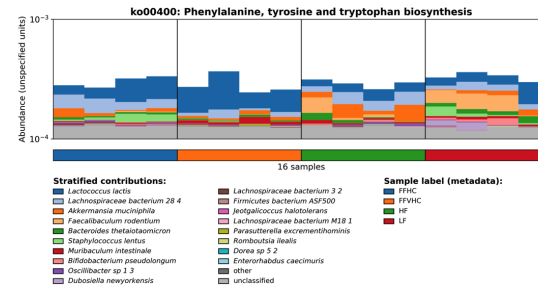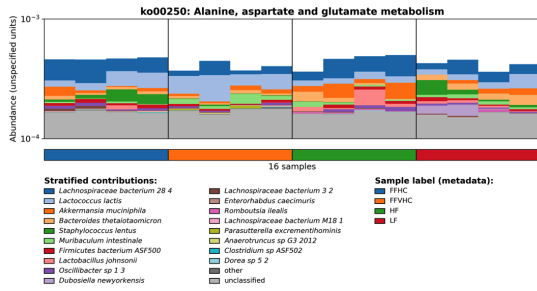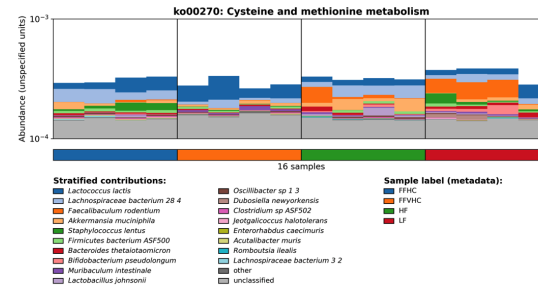

### C Lipid metabolism

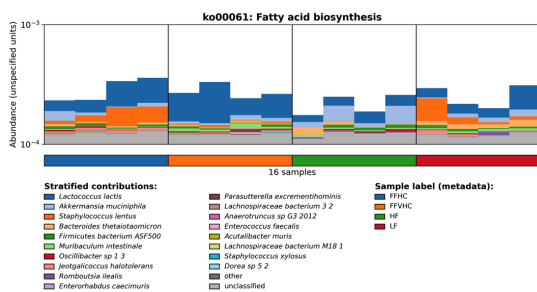

### D Glycan biosynthesis and metabolism

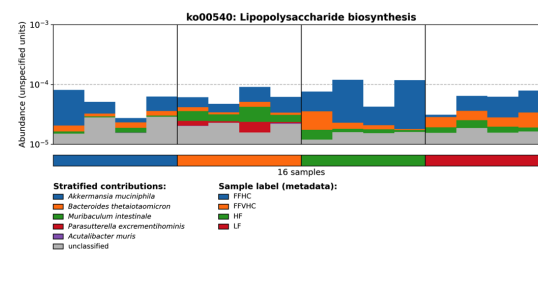

### E Vitamin metabolism

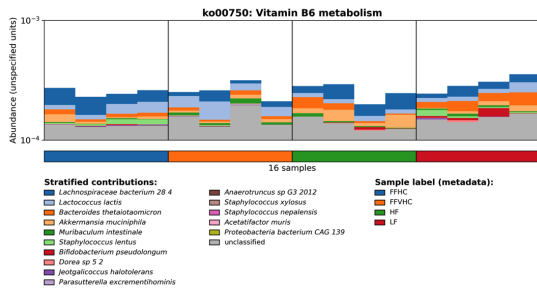

Supplement: NIHPP2023.01.09.523249v1-supplement-1.pdf [file NIHPP2023.01.09.523249v1-supplement-1.pdf]
